# Supplementary material
Source: publisher site journal article supplement (https://www.dovepress.com/article/291458)
Supplement: Supplementary file 1 [file get_supplementary_file.php]

**Supplementary Table S1. Diagnosis rate according to ICD-10**

| **Chapter (code)** | **N (%)** |
| --- | --- |
| 1. Certain infectious and parasitic diseases (A00-B99) | 566 (4.35) |
| 1. Neoplasms (C00-D48) | 611 (4.70) |
| 1. Diseases of the blood and blood-forming organs and certain disorders involving the immune mechanism (D50-D89) | 103 (0.79) |
| 1. Endocrine, nutritional and metabolic diseases (E00-E90) | 362 (2.78) |
| 1. Mental and behavioural disorders (F00-F99) | 125 (0.96) |
| 1. Diseases of the nervous system (G00-G99) | 242 (1.86) |
| 1. Diseases of the eye and adnexa (H00-H59) | 44 (0.34) |
| 1. Diseases of the ear and mastoid process (H60-H95) | 212 (1.63) |
| 1. Diseases of the circulatory system (I00-I99) | 1,921 (14.77) |
| 1. Diseases of the respiratory system (J00-J99) | 1,028 (7.91) |
| 1. Diseases of the digestive system (K00-K93) | 1,566 (12.04) |
| 1. Diseases of the skin and subcutaneous tissue (L00-L99) | 179 (1.38) |
| 1. Diseases of the musculoskeletal system and connective tissue (M00-M99) | 425 (3.27) |
| 1. Diseases of the genitourinary system (N00-N99) | 692 (5.32) |
| 1. Congenital malformations, deformations and chromosomal abnormalities (Q00-Q99) | 3 (0.02) |
| 1. Symptoms, signs and abnormal clinical and laboratory findings, not elsewhere classified (R00-R99)1 | 2,411 (18.77) |
| 1. Injury, poisoning and certain other consequences of external causes (S00-T98) | 2,329 (17.91) |
| 1. External causes of morbidity and mortality (V01-Y98) | 30 (0.23) |
| 1. Factors influencing health status and contact with health services (Z00-Z99) | 109 (0.84) |
| 1. Codes for special purposes (U00-U85) | 1 (0.01) |
| Not assessed | 13 (0.10) |

**Abbreviations:** ICD-10, International Classification of Diseases 10th revision

**Supplementary Table S2. List of PIMs corresponding contraindications (severity II)**

| **Ranking** | **Medication** | **N (%)** |
| --- | --- | --- |
| 1 | ketorolac | 1,081 (41.34) |
| 2 | chlorpheniramine | 615 (23.52) |
| 3 | midazolam | 236 (9.02) |
| 4 | diazepam | 197 (7.53) |
| 5 | triprolidine/pseudoephedrine | 114 (4.36) |
| 6 | methocarbamol | 98 (3.75) |
| 7 | chlorpheniramine/dihydrocodeine/methylephedrine/ammonium chloride | 75 (2.87) |
| 8 | acetaminophen/dichloralphenazone/isometheptene | 36 (1.38) |
| 9 | nifedipine | 33 (1.26) |
| 10 | amitriptyline | 32 (1.22) |
| 11 | bisacodyl | 21 (0.80) |
| 12 | chlorpheniramine/dihydrocodeine/methylephedrine/guaifenesin | 15 (0.57) |
| 13 | piroxicam | 14 (0.54) |
| 14 | naproxen | 11 (0.42) |
| 15 | cyproheptadine/vitamin B12/carnitine | 10 (0.38) |
| 16 | cyclobenzaprine | 8 (0.31) |
| 17 | ticlopidine/ginkgo biloba extract | 6 (0.23) |
| 18 | nortryptiline | 6 (0.23) |
| 19 | triazolam | 2 (0.08) |
| 20 | imipramine | 2 (0.08) |
| 21 | cyanocobalamin/cyproheptadine/carnitine/lysine | 2 (0.08) |
| 22 | sumatriptan | 1 (0.04) |

**Abbreviations:** PIM, potentially inappropriate medication

**Supplementary Table S3. List of PIMs corresponding precautions (severity I)**

| **Ranking** | **Medication** | **N (%)** |
| --- | --- | --- |
| 1 | metoclopramide | 2,606 (10.28) |
| 2 | famotidine | 2,312 (9.12) |
| 3 | tramadol | 1,822 (7.19) |
| 4 | acetaminophen | 1,269 (5.01) |
| 5 | nitroglycerin | 981 (3.87) |
| 6 | aspirin | 921 (3.63) |
| 7 | heparin | 791 (3.12) |
| 8 | ranitidine | 759 (2.99) |
| 9 | furosemide | 708 (2.79) |
| 10 | ciprofloxacin | 699 (2.76) |
| 11 | pethidine | 647 (2.55) |
| 12 | levofloxacin | 622 (2.45) |
| 13 | clopidogrel | 613 (2.42) |
| 14 | metronidazole | 581 (2.29) |
| 15 | piperacillin/tazobactam | 524 (2.07) |
| 16 | gallamine | 515 (2.03) |
| 17 | lidocaine | 494 (1.95) |
| 18 | nicardipine | 423 (1.67) |
| 19 | ipratropium | 380 (1.50) |
| 20 | cefotaxime | 334 (1.32) |
| 21 | dimenhydrinate | 294 (1.16) |
| 22 | cimetidine | 275 (1.09) |
| 23 | amoxicillin/clavulanic acid | 253 (1.00) |
| 24 | atorvastatin | 250 (0.99) |
| 25 | fentanyl | 243 (0.96) |
| 26 | morphine | 227 (0.90) |
| 27 | cephalexin | 203 (0.80) |
| 28 | potassium chloride | 203 (0.80) |
| 29 | dopamine | 202 (0.80) |
| 30 | epinephrine | 196 (0.77) |
| 31 | calcium gluconate | 191 (0.75) |
| 32 | domperidone | 189 (0.75) |
| 33 | methylprednisolone | 183 (0.72) |
| 34 | cefazolin | 173 (0.68) |
| 35 | celecoxib | 167 (0.66) |
| 36 | valproate | 158 (0.62) |
| 37 | cephradine | 156 (0.62) |
| 38 | prednisolone | 148 (0.58) |
| 39 | lorazepam | 143 (0.56) |
| 40 | lafutidine | 136 (0.54) |
| 41 | atropine | 131 (0.52) |
| 42 | hydrocortisone | 118 (0.47) |
| 43 | candesartan | 117 (0.46) |
| 44 | dexamethasone | 116 (0.46) |
| 45 | cefoxitin | 109 (0.43) |
| 46 | etomidate | 98 (0.39) |
| 47 | amiodarone | 94 (0.37) |
| 48 | ampicillin/sulbactam | 94 (0.37) |
| 49 | spironolactone | 90 (0.36) |
| 50 | diltiazem | 89 (0.35) |
| 51 | cefaclor | 78 (0.31) |
| 52 | mannitol | 77 (0.30) |
| 53 | hydroxyzine | 74 (0.29) |
| 54 | alteplase | 70 (0.28) |
| 55 | aluminum hydroxide/magnesium carbonate | 70 (0.28) |
| 56 | alprazolam | 68 (0.27) |
| 57 | cefotetan | 63 (0.25) |
| 58 | nifedipine | 62 (0.24) |
| 59 | gabapentin | 59 (0.23) |
| 60 | ceftizoxime | 52 (0.21) |
| 61 | chlorpheniramine/dextromethorphan etc | 51 (0.20) |
| 62 | diclofenac | 49 (0.19) |
| 63 | ranitidine/sucralfate/bismuth | 49 (0.19) |
| 64 | labetalol | 47 (0.19) |
| 65 | nimodipine | 45 (0.18) |
| 66 | phenytoin | 45 (0.18) |
| 67 | famciclovir | 43 (0.17) |
| 68 | codeine | 42 (0.17) |
| 69 | vancomycin | 40 (0.16) |
| 70 | carvedilol | 38 (0.15) |
| 71 | cefepime | 38 (0.15) |
| 72 | ibuprofen | 37 (0.15) |
| 73 | charcoal | 36 (0.14) |
| 74 | digoxin | 35 (0.14) |
| 75 | rosuvastatin | 35 (0.14) |
| 76 | clarithromycin | 30 (0.12) |
| 77 | isosorbide dinitrate | 28 (0.11) |
| 78 | atenolol | 25 (0.10) |
| 79 | cefamandol | 25 (0.10) |
| 80 | cefixime | 25 (0.10) |
| 81 | ketamine | 24 (0.09) |
| 82 | vasopressin | 22 (0.09) |
| 83 | oxycodone | 21 (0.08) |
| 84 | warfarin | 21 (0.08) |
| 85 | amlodipine | 20 (0.08) |
| 86 | enoxaparin | 20 (0.08) |
| 87 | isosorbide mononitrate | 20 (0.08) |
| 88 | amoxicillin/sulbactam | 19 (0.07) |
| 89 | iron | 18 (0.07) |
| 90 | theophylline | 18 (0.07) |
| 91 | metformin | 17 (0.07) |
| 92 | amikacin | 16 (0.06) |
| 93 | torsemide | 16 (0.06) |
| 94 | clonazepam | 15 (0.06) |
| 95 | glimepiride | 15 (0.06) |
| 96 | imipenem/cilastatin | 15 (0.06) |
| 97 | urokinase | 15 (0.06) |
| 98 | zolpidem | 15 (0.06) |
| 99 | cefoperazone/sulbactam | 14 (0.06) |
| 100 | sodium phosphate | 14 (0.06) |
| 101 | succinylcholine | 13 (0.05) |
| 102 | felodipine | 12 (0.05) |
| 103 | proparacaine | 12 (0.05) |
| 104 | aztreonam | 11 (0.04) |
| 105 | remifentanil | 11 (0.04) |
| 106 | thiopental | 11 (0.04) |
| 107 | amlodipine/valsartan | 10 (0.04) |
| 108 | hydromorphone | 10 (0.04) |
| 109 | levothyroxine | 10 (0.04) |
| 110 | losartan/hydrochlorothiazide | 10 (0.04) |
| 111 | netilmicin | 10 (0.04) |
| 112 | salbutamol | 10 (0.04) |
| 113 | dihydrocodeine | 9 (0.04) |
| 114 | etodolac | 9 (0.04) |
| 115 | olmesartan/hydrochlorothiazide | 9 (0.04) |
| 116 | ceftazidime | 8 (0.03) |
| 117 | cinnarizine | 8 (0.03) |
| 118 | doxazosin | 8 (0.03) |
| 119 | fexofenadine | 8 (0.03) |
| 120 | hydralazine | 8 (0.03) |
| 121 | hydrochlorothiazide | 8 (0.03) |
| 122 | levetiracetam | 8 (0.03) |
| 123 | sitagliptin/metformin | 8 (0.03) |
| 124 | sulindac | 8 (0.03) |
| 125 | etizolam | 7 (0.03) |
| 126 | fluorometholone | 7 (0.03) |
| 127 | acyclovir | 6 (0.02) |
| 128 | baclofen | 6 (0.02) |
| 129 | cefadroxil | 6 (0.02) |
| 130 | ebastine/pseudoephedrine | 6 (0.02) |
| 131 | fexofenadine/pseudoephedrine | 6 (0.02) |
| 132 | haloperidol | 6 (0.02) |
| 133 | meloxicam | 6 (0.02) |
| 134 | valaciclovir | 6 (0.02) |
| 135 | acetazolamide | 5 (0.02) |
| 136 | bisacodyl/docusate | 5 (0.02) |
| 137 | cefmetazole | 5 (0.02) |
| 138 | cefuroxime | 5 (0.02) |
| 139 | glycopyrrolate | 5 (0.02) |
| 140 | iodixanol | 5 (0.02) |
| 141 | mefenamic acid | 5 (0.02) |
| 142 | nabumetone | 5 (0.02) |
| 143 | pseudoephedrine | 5 (0.02) |
| 144 | pyridostigmine bromide | 5 (0.02) |
| 145 | quetiapine | 5 (0.02) |
| 146 | amino acid TPN | 4 (0.02) |
| 147 | calcium/cholecalciferol | 4 (0.02) |
| 148 | carbamazepine | 4 (0.02) |
| 149 | cetirizine | 4 (0.02) |
| 150 | dalteparin | 4 (0.02) |
| 151 | erythromycin | 4 (0.02) |
| 152 | flecainide | 4 (0.02) |
| 153 | insulin glargine | 4 (0.02) |
| 154 | levodopa/benserazide | 4 (0.02) |
| 155 | multivitamin | 4 (0.02) |
| 156 | phenylephrine/tropicamide | 4 (0.02) |
| 157 | pregabalin | 4 (0.02) |
| 158 | telmisartan/amlodipine | 4 (0.02) |
| 159 | trazodone | 4 (0.02) |
| 160 | verapamil | 4 (0.02) |
| 161 | allantoin/lidocaine/prednisolone/tocopherol | 3 (0.01) |
| 162 | aminophylline | 3 (0.01) |
| 163 | brinzolamide/timolol | 3 (0.01) |
| 164 | colchicine | 3 (0.01) |
| 165 | ethambutol | 3 (0.01) |
| 166 | levodopa/carbidopa/entacapone | 3 (0.01) |
| 167 | lisinopril | 3 (0.01) |
| 168 | paroxetine | 3 (0.01) |
| 169 | phenylephrine | 3 (0.01) |
| 170 | ramipril | 3 (0.01) |
| 171 | terazosin | 3 (0.01) |
| 172 | tiotropium | 3 (0.01) |
| 173 | allopurinol | 2 (0.01) |
| 174 | aluminum hydroxide | 2 (0.01) |
| 175 | amlodipine/atorvastatin | 2 (0.01) |
| 176 | amlodipine/losartan | 2 (0.01) |
| 177 | calcium/ergocalciferol | 2 (0.01) |
| 178 | chlorphenesin carbamide | 2 (0.01) |
| 179 | dexamethasone/neomycin/polymyxin B | 2 (0.01) |
| 180 | flavoxate | 2 (0.01) |
| 181 | fludrocortisone | 2 (0.01) |
| 182 | glimepiride/metformin | 2 (0.01) |
| 183 | isoniazid | 2 (0.01) |
| 184 | propranolol | 2 (0.01) |
| 185 | simvastatin/ezetimibe | 2 (0.01) |
| 186 | sodium nitroprusside | 2 (0.01) |
| 187 | tizanidine | 2 (0.01) |
| 188 | venlafaxine | 2 (0.01) |
| 189 | amiloride | 1 (< 0.01) |
| 190 | amlodipine/olmesartan | 1 (< 0.01) |
| 191 | benztropine | 1 (< 0.01) |
| 192 | bromazepam | 1 (< 0.01) |
| 193 | buprenorphine | 1 (< 0.01) |
| 194 | colonlyte | 1 (< 0.01) |
| 195 | cycloserine | 1 (< 0.01) |
| 196 | desmopressin | 1 (< 0.01) |
| 197 | divalproex sodium | 1 (< 0.01) |
| 198 | duloxetine | 1 (< 0.01) |
| 199 | escitalopram | 1 (< 0.01) |
| 200 | estradiol | 1 (< 0.01) |
| 201 | gentamicin | 1 (< 0.01) |
| 202 | insulin detemir | 1 (< 0.01) |
| 203 | lindane | 1 (< 0.01) |
| 204 | methazolamide | 1 (< 0.01) |
| 205 | minoxidil | 1 (< 0.01) |
| 206 | moexipril | 1 (< 0.01) |
| 207 | nafcillin | 1 (< 0.01) |
| 208 | polyethylene glycol/potassium chloride/sodium bicarbonate/sodium chloride | 1 (< 0.01) |
| 209 | propafenone | 1 (< 0.01) |
| 210 | propofol | 1 (< 0.01) |
| 211 | protirelin | 1 (< 0.01) |
| 212 | simvastatin | 1 (< 0.01) |
| 213 | sitagliptin | 1 (< 0.01) |
| 214 | sotalol | 1 (< 0.01) |
| 215 | sulfamethoxazole/trimethoprim | 1 (< 0.01) |
| 216 | topiramate | 1 (< 0.01) |
| 217 | triamcinolone | 1 (< 0.01) |
| 218 | trihexyphenidyl | 1 (< 0.01) |
| 219 | zonisamide | 1 (< 0.01) |

**Abbreviations:** PIM, potentially inappropriate medication

**Supplementary Table S4. List of pDDIs corresponding contraindications (severity III)**

| **Ranking** | **Drug-drug interaction** | **N (%)** |
| --- | --- | --- |
| 1 | ketorolac-aceclofenac | 61 (37.89) |
| 2 | ketorolac-celecoxib | 32 (19.88) |
| 3 | ketorolac-ibuprofen | 20 (12.42) |
| 4 | levofloxacin-amiodarone | 12 (7.45) |
| 5 | esomeprazole-clopidogrel | 10 (6.21) |
| 6 | ketorolac-loxoprofen | 6 (3.73) |
| 7 | ketorolac-aspirin | 4 (2.48) |
| 8 | ketorolac-naproxen | 3 (1.86) |
| 9 | ketorolac-piroxicam | 3 (1.86) |
| 10 | ketorolac-zaltoprofen | 2 (1.24) |
| 11 | ketorolac-etodolac | 2 (1.24) |
| 12 | ketorolac-meloxicam | 2 (1.24) |
| 13 | azithromycin-amiodarone | 2 (1.24) |
| 14 | ketorolac-sulindac | 1 (0.62) |
| 15 | phloroglucinol-potassium chloride | 1 (0.62) |

**Abbreviations:** pDDI, potential drug-drug interaction

**Supplementary Table S5. List of pDDIs corresponding severe interactions (severity II)**

| **Ranking** | **Drug-drug interaction** | **N (%)** |
| --- | --- | --- |
| 1 | aspirin-heparin | 424 (69.85) |
| 2 | levofloxacin-human insulin | 31 (5.11) |
| 3 | ciprofloxacin-human insulin | 17 (2.80) |
| 4 | amiodarone-diltiazem | 13 (2.14) |
| 5 | amitriptyline-acetaminophen/tramadol | 13 (2.14) |
| 6 | amitriptyline-tramadol | 11 (1.81) |
| 7 | amiodarone-digoxin | 9 (1.48) |
| 8 | piperacillin/tazobactam-cisatracurium | 9 (1.48) |
| 9 | ciprofloxacin-magnesium oxide | 8 (1.32) |
| 10 | enoxaparin-aspirin | 8 (1.32) |
| 11 | amiodarone-fentanyl | 7 (1.15) |
| 12 | midazolam-diltiazem | 6 (0.99) |
| 13 | spironolactone-potassium chloride | 4 (0.66) |
| 14 | acetaminophen/tramadol-cyclobenzaprine | 3 (0.49) |
| 15 | clopidogrel-cimetidine | 3 (0.49) |
| 16 | clopidogrel-oseltamivir | 3 (0.49) |
| 17 | dopamine-phenytoin | 3 (0.49) |
| 18 | heparin-ketorolac | 3 (0.49) |
| 19 | levofloxacin-magnesium oxide | 3 (0.49) |
| 20 | rifampicin-isoniazid | 3 (0.49) |
| 21 | rifampicin-pyrazinamide | 3 (0.49) |
| 22 | nortriptyline-chlorpheniramine/dextromethorphan | 2 (0.33) |
| 23 | tramadol-cyclobenzaprine | 2 (0.33) |
| 24 | warfarin-ceftriaxone | 2 (0.33) |
| 25 | nortriptyline-acetaminophen/tramadol | 1 (0.16) |
| 26 | imipramine-acetaminophen/tramadol | 1 (0.16) |
| 27 | amiodarone-salmeterol/fluticasone | 1 (0.16) |
| 28 | amiodarone-nicardipine | 1 (0.16) |
| 29 | ciprofloxacin-metformin | 1 (0.16) |
| 30 | ciprofloxacin-gliclazide | 1 (0.16) |
| 31 | ciprofloxacin-glimepiride | 1 (0.16) |
| 32 | digoxin-azithromycin | 1 (0.16) |
| 33 | dopamine-amitriptyline | 1 (0.16) |
| 34 | heparin-abciximab | 1 (0.16) |
| 35 | levofloxacin-almagate | 1 (0.16) |
| 36 | tramadol-nortriptyline | 1 (0.16) |
| 37 | tramadol-duloxetine | 1 (0.16) |
| 38 | warfarin-azithromycin | 1 (0.16) |
| 39 | warfarin-ciprofloxacin | 1 (0.16) |
| 40 | warfarin-amiodarone | 1 (0.16) |
| 41 | warfarin-phytonadione | 1 (0.16) |

**Abbreviations:** pDDI, potential drug-drug interaction

**Supplementary Table S6. List of pDDIs corresponding moderate interactions (severity I)**

| **Ranking** | **Drug-drug interaction** | **N (%)** |
| --- | --- | --- |
| 1 | aspirin-clopidogrel | 510 (26.84) |
| 2 | heparin-clopidogrel | 346 (18.21) |
| 3 | atorvastatin-clopidogrel | 181 (9.53) |
| 4 | furosemide-candesartan | 73 (3.84) |
| 5 | levofloxacin-budesonide | 47 (2.47) |
| 6 | levofloxacin-hydrocortisone | 42 (2.21) |
| 7 | spironolactone-candesartan | 38 (2.00) |
| 8 | furosemide-fimasartan | 35 (1.84) |
| 9 | levofloxacin-azithromycin | 34 (1.79) |
| 10 | digoxin-furosemide | 32 (1.68) |
| 11 | levofloxacin-methylprednisolone | 28 (1.47) |
| 12 | human insulin-epinephrine | 26 (1.37) |
| 13 | valproate-nimodipine | 22 (1.16) |
| 14 | spironolactone-fimasartan | 17 (0.89) |
| 15 | digoxin-spironolactone | 15 (0.79) |
| 16 | cimetidine-nicardipine | 14 (0.74) |
| 17 | levofloxacin-nicardipine | 13 (0.68) |
| 18 | nicardipine-calcium | 13 (0.68) |
| 19 | valproate-lorazepam | 13 (0.68) |
| 20 | aspirin-glimepiride | 12 (0.63) |
| 21 | cimetidine-pethidine | 11 (0.58) |
| 22 | amikacin-cefazolin | 10 (0.53) |
| 23 | nifedipine-atenolol | 10 (0.53) |
| 24 | aspirin-hydrocortisone | 9 (0.47) |
| 25 | furosemide-olmesartan | 9 (0.47) |
| 26 | valproate-phenytoin | 9 (0.47) |
| 27 | ciprofloxacin-hydrocortisone | 8 (0.42) |
| 28 | clopidogrel-enoxaparin | 8 (0.42) |
| 29 | nifedipine-calcium | 8 (0.42) |
| 30 | cimetidine-diazepam | 7 (0.37) |
| 31 | furosemide-losartan | 7 (0.37) |
| 32 | levofloxacin-formoterol | 7 (0.37) |
| 33 | torsemide-candesartan | 7 (0.37) |
| 34 | aspirin-methylprednisolone | 6 (0.32) |
| 35 | aspirin-warfarin | 6 (0.32) |
| 36 | cimetidine-phenytoin | 6 (0.32) |
| 37 | ciprofloxacin-ranitidine/sucralfate/bismuth | 6 (0.32) |
| 38 | netilmicin-cefazolin | 6 (0.32) |
| 39 | nifedipine-labetalol | 6 (0.32) |
| 40 | warfarin-heparin | 6 (0.32) |
| 41 | furosemide-irbesartan | 5 (0.26) |
| 42 | furosemide-valsartan/amlodipine | 5 (0.26) |
| 43 | levofloxacin-prednisolone | 5 (0.26) |
| 44 | potassium chloride-candesartan | 5 (0.26) |
| 45 | spironolactone-losartan | 5 (0.26) |
| 46 | acetazolamide-dorzolamide/timolol | 4 (0.21) |
| 47 | amikacin-cephazedone | 4 (0.21) |
| 48 | aspirin-prednisolone | 4 (0.21) |
| 49 | aspirin-ticlopidine hcl/ginkgo biloba extract | 4 (0.21) |
| 50 | ciprofloxacin-prednisolone | 4 (0.21) |
| 51 | clopidogrel-alteplase | 4 (0.21) |
| 52 | digoxin-diltiazem | 4 (0.21) |
| 53 | furosemide-ketorolac | 4 (0.21) |
| 54 | heparin-cilostazol | 4 (0.21) |
| 55 | levofloxacin-domperidone | 4 (0.21) |
| 56 | netilmicin-cefoxitin | 4 (0.21) |
| 57 | phenytoin-dexamethasone | 4 (0.21) |
| 58 | aspirin-valproate | 3 (0.16) |
| 59 | cimetidine-midazolam | 3 (0.16) |
| 60 | clopidogrel-warfarin | 3 (0.16) |
| 61 | furosemide-olmesartan/hydrochlorothiazide | 3 (0.16) |
| 62 | furosemide-telmisartan | 3 (0.16) |
| 63 | levofloxacin-dexamethasone | 3 (0.16) |
| 64 | spironolactone-olmesartan | 3 (0.16) |
| 65 | acetazolamide-brinzolamide/timolol | 2 (0.11) |
| 66 | amlodipine-calcium/cholecalciferol | 2 (0.11) |
| 67 | aspirin-codeine/ibuprofen/acetaminophen | 2 (0.11) |
| 68 | aspirin-lisinopril | 2 (0.11) |
| 69 | budesonide-moxifloxacin | 2 (0.11) |
| 70 | cefaclor-aluminum hydroxide/magnesium carbonate | 2 (0.11) |
| 71 | cefpodoxime -magnesium oxide | 2 (0.11) |
| 72 | cimetidine-morphine | 2 (0.11) |
| 73 | ciprofloxacin-calcium | 2 (0.11) |
| 74 | clopidogrel-ketorolac | 2 (0.11) |
| 75 | dexamethasone-thiopental | 2 (0.11) |
| 76 | digoxin-hydrochlorothiazide | 2 (0.11) |
| 77 | digoxin-nifedipine | 2 (0.11) |
| 78 | diltiazem-atenolol | 2 (0.11) |
| 79 | domperidone-moxifloxacin | 2 (0.11) |
| 80 | felodipine-calcium | 2 (0.11) |
| 81 | furosemide-codeine/ibuprofen/acetaminophen | 2 (0.11) |
| 82 | furosemide-lisinopril | 2 (0.11) |
| 83 | furosemide-losartan/amlodipine | 2 (0.11) |
| 84 | furosemide-losartan/hydrochlorothiazide | 2 (0.11) |
| 85 | gliclazide-carvedilol | 2 (0.11) |
| 86 | gliclazide-nebivolol | 2 (0.11) |
| 87 | gliclazide-olmesartan/hydrochlorothiazide | 2 (0.11) |
| 88 | levofloxacin-ranitidine/sucralfate/bismuth | 2 (0.11) |
| 89 | levofloxacin-salmeterol/fluticasone | 2 (0.11) |
| 90 | losartan/amlodipine-codeine/ibuprofen/acetaminophen | 2 (0.11) |
| 91 | netilmicin-cephalexin | 2 (0.11) |
| 92 | nifedipine-calcium/cholecalciferol | 2 (0.11) |
| 93 | phenytoin-folic acid | 2 (0.11) |
| 94 | potassium chloride-losartan/hydrochlorothiazide | 2 (0.11) |
| 95 | spironolactone-irbesartan | 2 (0.11) |
| 96 | theophylline-carvedilol | 2 (0.11) |
| 97 | warfarin-budesonide | 2 (0.11) |
| 98 | warfarin-simvastatin | 2 (0.11) |
| 99 | acarbose-olmesartan/hydrochlorothiazide | 1 (0.05) |
| 100 | aceclofenac-cilostazol | 1 (0.05) |
| 101 | amikacin-cefepime | 1 (0.05) |
| 102 | amitriptyline-salbutamol | 1 (0.05) |
| 103 | amitriptyline-cimetidine | 1 (0.05) |
| 104 | aspirin-ibuprofen | 1 (0.05) |
| 105 | aspirin-dexamethasone | 1 (0.05) |
| 106 | aspirin-glimepiride/metformin | 1 (0.05) |
| 107 | aspirin-paroxetine | 1 (0.05) |
| 108 | carvedilol-human insulin | 1 (0.05) |
| 109 | cefdinir-magnesium oxide | 1 (0.05) |
| 110 | cimetidine-fentanyl | 1 (0.05) |
| 111 | cimetidine-nifedipine | 1 (0.05) |
| 112 | ciprofloxacin-theophylline | 1 (0.05) |
| 113 | ciprofloxacin-budesonide | 1 (0.05) |
| 114 | clopidogrel-aceclofenac | 1 (0.05) |
| 115 | clopidogrel-codeine/ibuprofen/acetaminophen | 1 (0.05) |
| 116 | clopidogrel-diclofenac | 1 (0.05) |
| 117 | clopidogrel-lornoxicam | 1 (0.05) |
| 118 | clopidogrel-naproxen | 1 (0.05) |
| 119 | clopidogrel-urokinase | 1 (0.05) |
| 120 | digoxin-metoclopramide | 1 (0.05) |
| 121 | digoxin-nicardipine | 1 (0.05) |
| 122 | digoxin-torsemide | 1 (0.05) |
| 123 | diltiazem-calcium | 1 (0.05) |
| 124 | diltiazem-cilostazol | 1 (0.05) |
| 125 | domperidone-budesonide/formoterol | 1 (0.05) |
| 126 | fimasartan-amiloride | 1 (0.05) |
| 127 | fimasartan-celecoxib | 1 (0.05) |
| 128 | fimasartan-torsemide | 1 (0.05) |
| 129 | formoterol-azithromycin | 1 (0.05) |
| 130 | furosemide-celecoxib | 1 (0.05) |
| 131 | furosemide-valsartan | 1 (0.05) |
| 132 | gabapentin-aluminum hydroxide/magnesium carbonate | 1 (0.05) |
| 133 | gentamicin-ceftezole | 1 (0.05) |
| 134 | glimepiride-carvedilol | 1 (0.05) |
| 135 | glimepiride-hydrochlorothiazide | 1 (0.05) |
| 136 | glimepiride-losartan/hydrochlorothiazide | 1 (0.05) |
| 137 | heparin-lornoxicam | 1 (0.05) |
| 138 | heparin-ticlopidine/ginkgo biloba extract | 1 (0.05) |
| 139 | heparin-diclofenac | 1 (0.05) |
| 140 | human insulin-carvedilol | 1 (0.05) |
| 141 | human insulin-labetalol | 1 (0.05) |
| 142 | human insulin-olmesartan/hydrochlorothiazide | 1 (0.05) |
| 143 | insulin glargine-carvedilol | 1 (0.05) |
| 144 | ketorolac-moexipril | 1 (0.05) |
| 145 | levofloxacin-clarithromycin | 1 (0.05) |
| 146 | levofloxacin-erythromycin | 1 (0.05) |
| 147 | levothyroxine-digoxin | 1 (0.05) |
| 148 | levothyroxine-iron | 1 (0.05) |
| 149 | lisinopril-potassium chloride | 1 (0.05) |
| 150 | losartan-celecoxib | 1 (0.05) |
| 151 | losartan-potassium chloride | 1 (0.05) |
| 152 | nebivolol-codeine/ibuprofen/acetaminophen | 1 (0.05) |
| 153 | nebivolol-insulin aspart | 1 (0.05) |
| 154 | nortryptiline-salbutamol | 1 (0.05) |
| 155 | potassium chloride-valsartan/amlodipine | 1 (0.05) |
| 156 | prednisolone-moxifloxacin | 1 (0.05) |
| 157 | propafenone-azithromycin | 1 (0.05) |
| 158 | ramipril-ketorolac | 1 (0.05) |
| 159 | simvastatin-diltiazem | 1 (0.05) |
| 160 | spironolactone-losartan/amlodipine | 1 (0.05) |
| 161 | spironolactone-losartan/hydrochlorothiazide | 1 (0.05) |
| 162 | spironolactone-olmesartan/hydrochlorothiazide | 1 (0.05) |
| 163 | spironolactone-valsartan | 1 (0.05) |
| 164 | spironolactone-valsartan/amlodipine | 1 (0.05) |
| 165 | telmisartan/amlodipine-codeine/ibuprofen/acetaminophen | 1 (0.05) |
| 166 | telmisartan/amlodipine-ketorolac | 1 (0.05) |
| 167 | torsemide-valsartan | 1 (0.05) |
| 168 | torsemide-olmesartan | 1 (0.05) |
| 169 | tramadol-haloperidol | 1 (0.05) |
| 170 | tramadol-quetiapine | 1 (0.05) |
| 171 | warfarin-carbamazepine | 1 (0.05) |
| 172 | warfarin-prednisolone | 1 (0.05) |
| 173 | warfarin-rosuvastatin | 1 (0.05) |

**Abbreviations:** pDDI, potential drug-drug interaction
